# Supplementary material
Source: PubMed Central journal article supplement (PMC4246985)
Supplement: pnas.201409638SI.pdf [file pnas.201409638SI.pdf]

# Supporting Information

Lee et al. 10.1073/pnas.1409638111

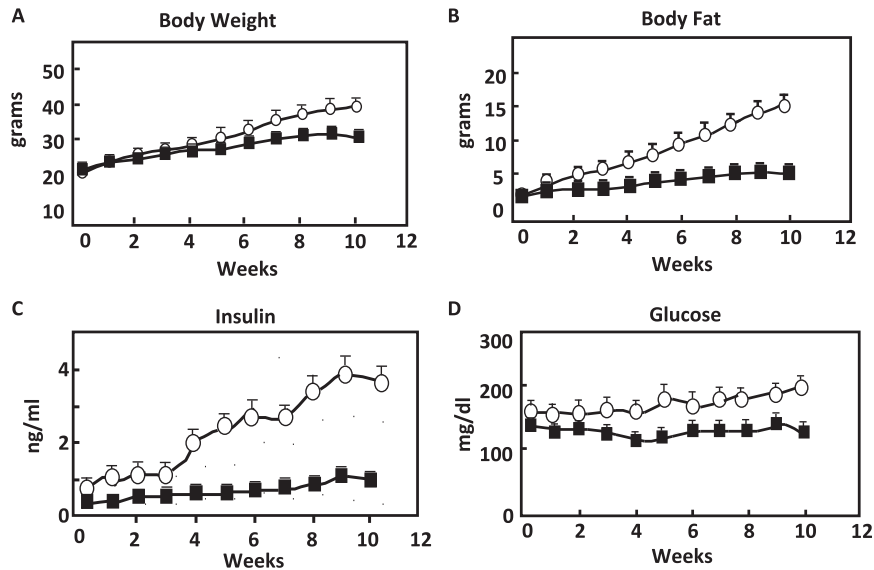

**Fig. S1.** Comparison of glucagon receptor (*Gcgr*<sup>+/+</sup>) (white symbols) and *Gcgr*<sup>-/-</sup> mice (black symbols) on a 60% fat diet plus 10% sucrose supplementation for 12 wk. (A) Body weight. (B) Body fat. (C) Insulin. (D) Glucose. *n* = 6 in each group. Error bars are SEM.

**Table S1.** Sequences of SYBR Green PCR primers used in this study

| mRNA           | Accession no. | Forward primer          | Reverse primer         |
|----------------|---------------|-------------------------|------------------------|
| SREBP-1c       | NM_011480     | GGCACTAAGTGCCCTCAACCT   | TGCGCAGGAGATGCTATCTCCA |
| Preproglucagon | NM_008100.3   | GATCATCCCAGCTTCCCAG     | CTGGTAAAGGTCCTTCAGC    |
| Preproinsulin  | NM_008386.3   | GGGGAGCGTGGCTTCTTCTA    | GGGGACAGAATTCAGTGGCA   |
| 36B4           | NM_007475     | GGACCCGAGAAGACCTCCTT    | TCCAGGCTTTGGGCATCACC   |
| GAPDH          | NM_008084.2   | CAAGGTCATCCATGACAACCTTG | GGCCATCCACAGTCTTCTGG   |

SREBP1c, sterol response element binding protein.

**Table S2.** Blood glucose levels for *Gcgr*<sup>-/-</sup> mice treated with Adv- $\beta$ -galactosidase

| Week             |                |                |                |                |
|------------------|----------------|----------------|----------------|----------------|
| 0                | 1              | 2              | 3              | 4              |
| 102.4 $\pm$ 10.0 | 110 $\pm$ 8.51 | 104 $\pm$ 7.90 | 107 $\pm$ 9.70 | 101 $\pm$ 9.11 |

Treatment of Adv- $\beta$ -galactosidase cDNA does not change levels of glucose in *Gcgr*<sup>-/-</sup> mice. *n* = 5. Blood glucose concentrations are mg/100 mL.
